# Supplementary material for: xMSanalyzer: automated pipeline for improved feature detection and downstream analysis of large-scale, non-targeted metabolomics data
Source: PubMed Central journal article supplement (PMC3562220; doi:10.1186/1471-2105-14-15), 2013-01-16

**Additional File 11.** MS/MS validation results for the 8 putative metabolites identified using DeconMSn. The first row shows the elution profile of the feature, middle row shows the full MS scan, and the last row shows the deconvoluted MS/MS spectrum obtained from DeconMSn.

1) m/z 388.254

Elution profile

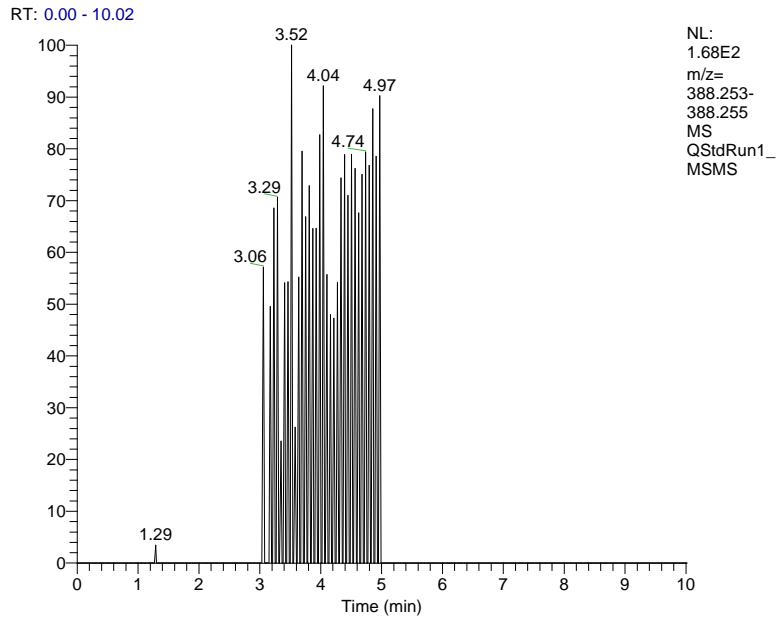

MS, FTMS

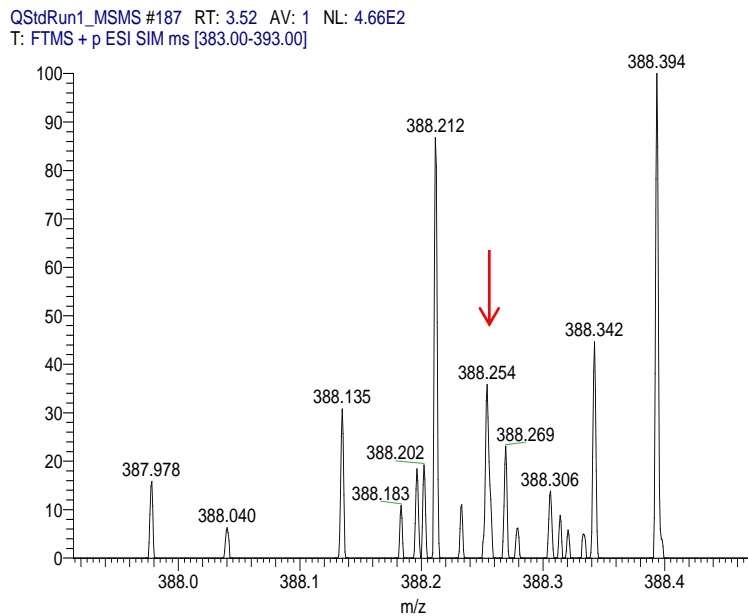

Deconvoluted MS/MS  
CID in Ion trap

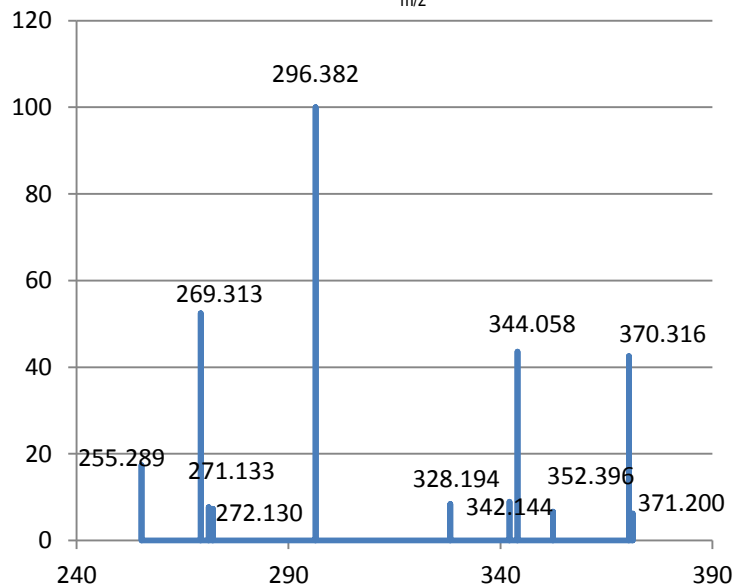

## 2) m/z 430.244

### Elution profile

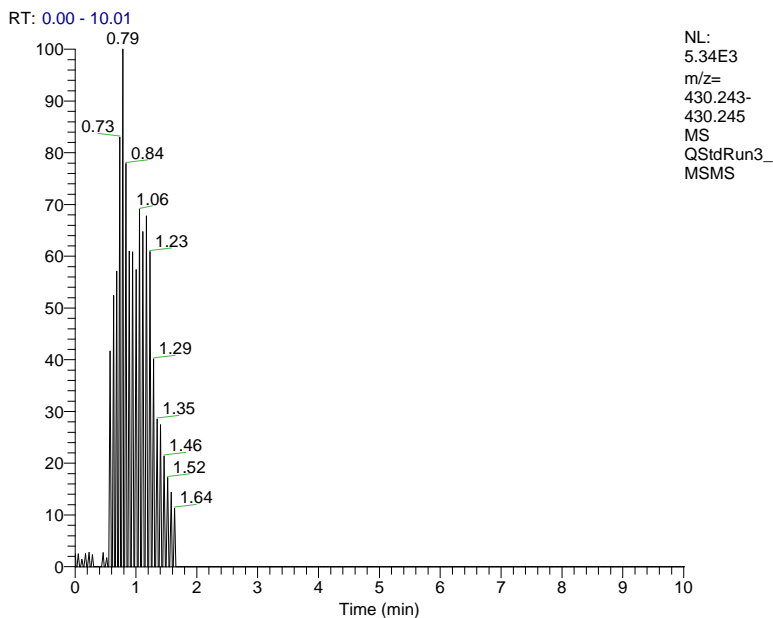

### MS, FTMS

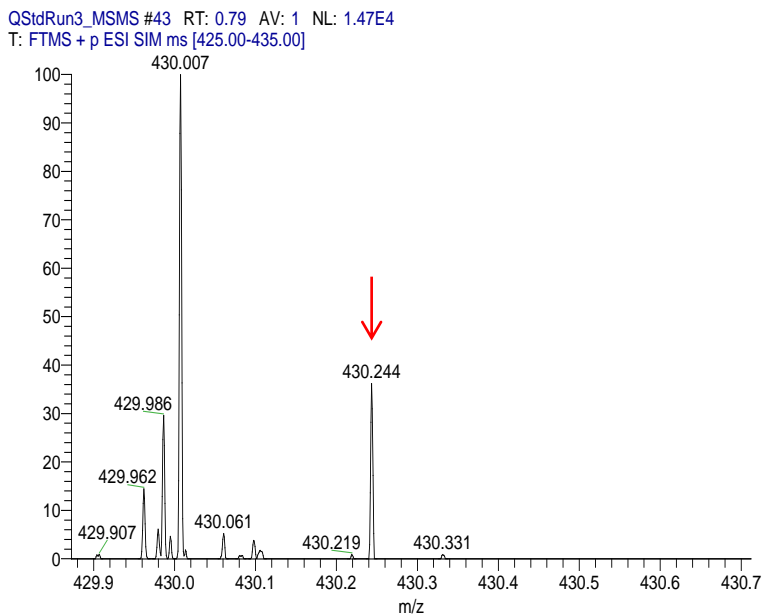

### Deconvoluted MS/MS CID in Ion trap

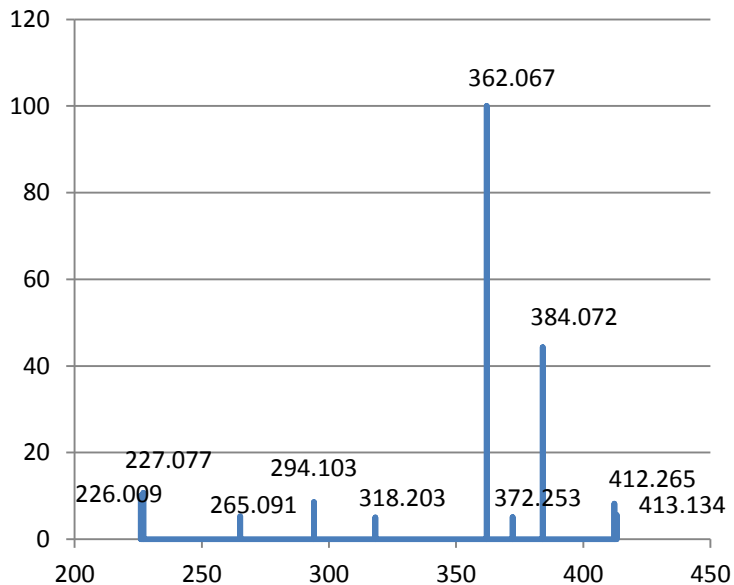

3) m/z 337.235

Elution profile

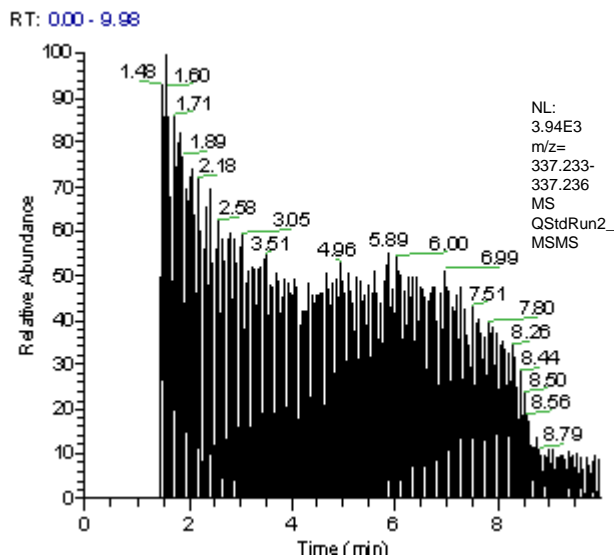

MS, FTMS

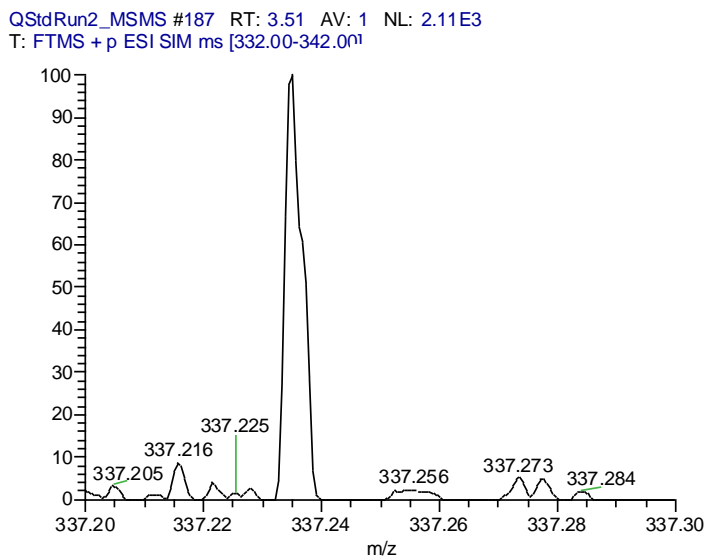

Deconvoluted MS/MS  
CID in Ion trap

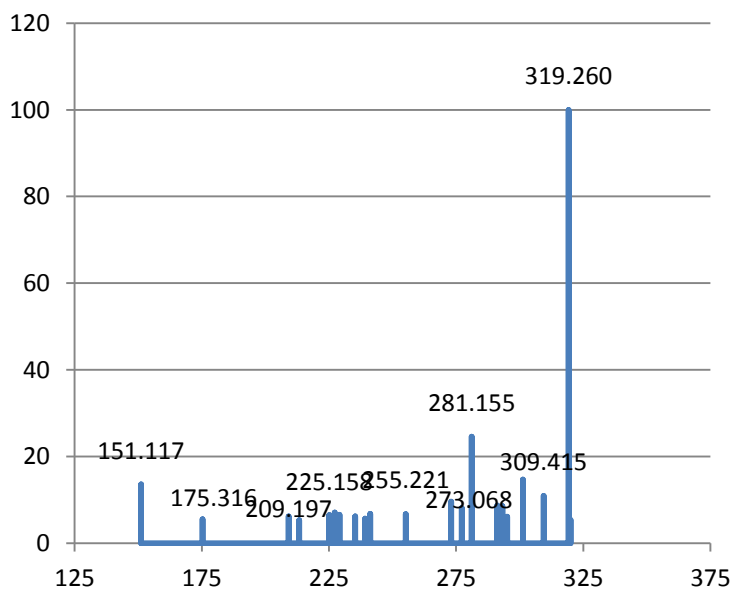

4) m/z 340.160

RT: 0.00 - 9.98

NL:  
5.57E2  
m/z=  
340.159-  
340.161  
MS  
QStdRun2\_  
MSMS

Elution profile

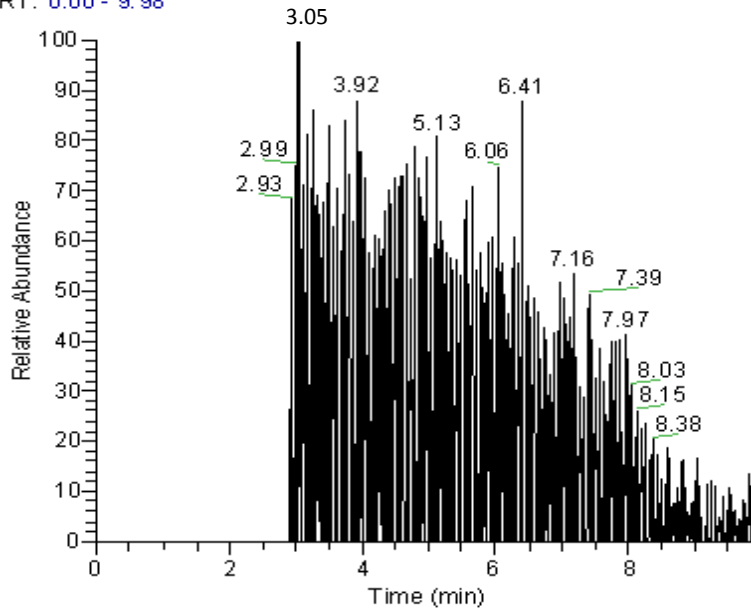

MS, FTMS

QStdRun2\_MSMS #292 RT: 5.54 AV: 1 NL: 3.78E2  
T: FTMS + p ESI SIM ms [335.00-345.00]

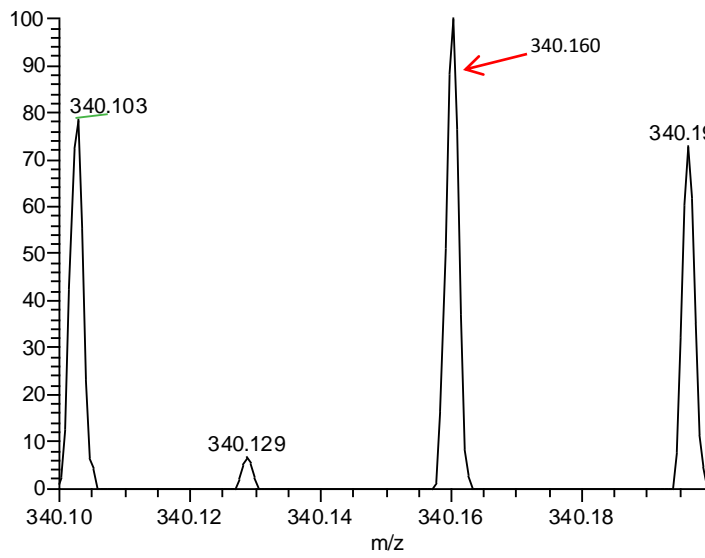

Deconvoluted MS/MS  
CID in Ion trap

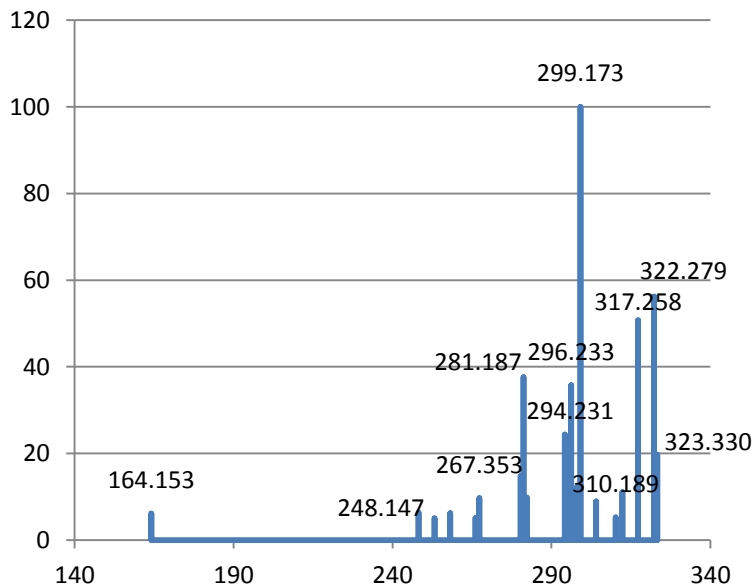

5) m/z 409.173

RT: 0.00 - 10.01

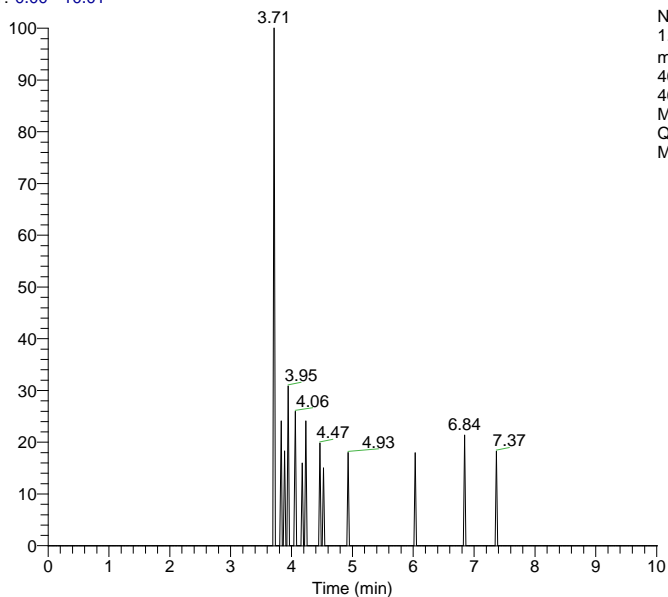

NL:  
1.46E2  
m/z=  
409.171-  
409.175  
MS  
QStdRun3\_  
MSMS

Elution profile

QStdRun3\_MSMS #199 RT: 3.71 AV: 1 NL: 1.42E3  
T: FTMS + p ESI SIM ms [404.00-414.00]

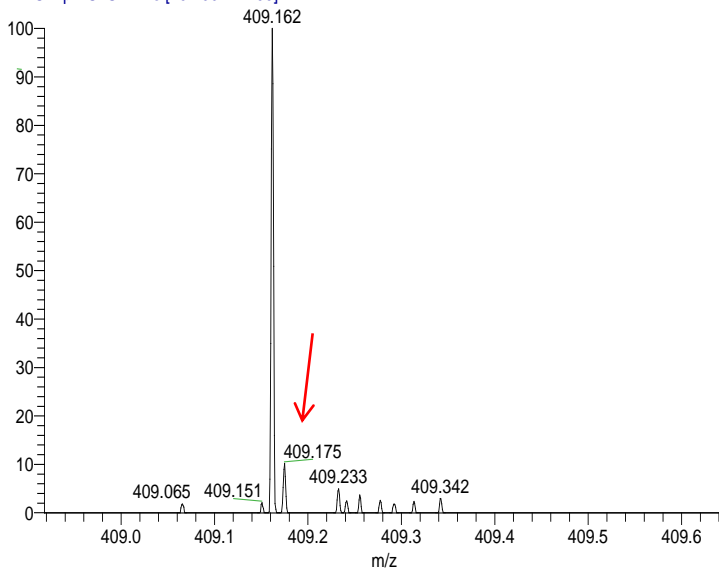

MS, FTMS

Deconvoluted MS/MS  
CID in Ion trap

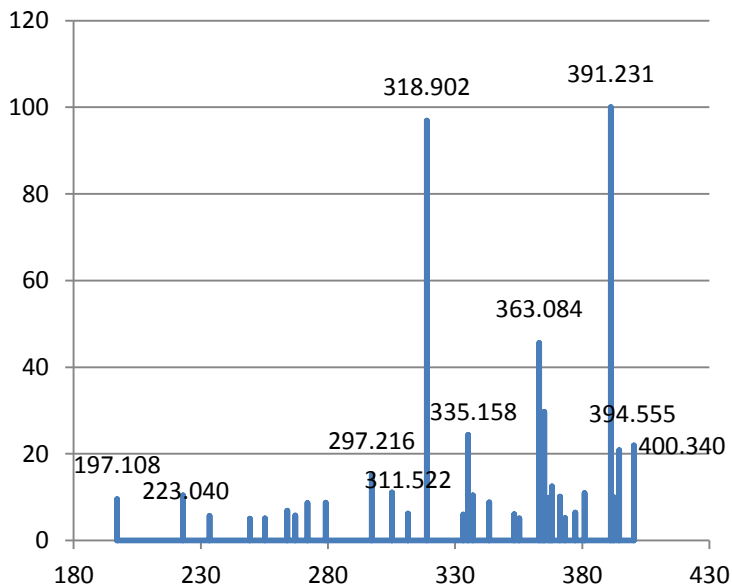

6) m/z 366.133

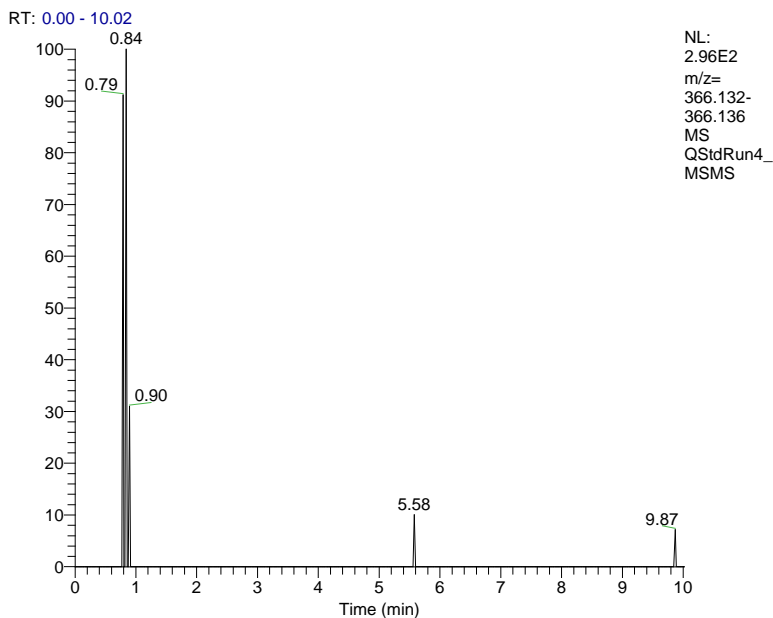

QStdRun4\_MSMS #43 RT: 0.79 AV: 1 NL: 4.50E2  
T: FTMS + p ESI SIM ms [361.00-371.00]

MS, FTMS

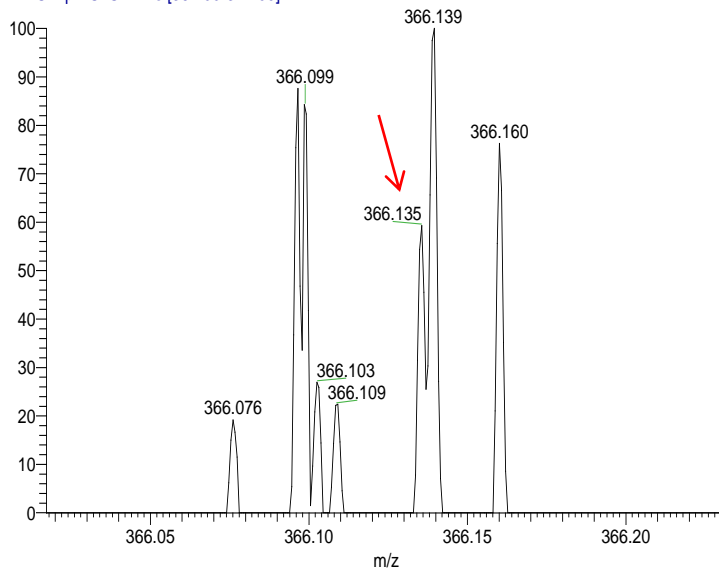

Deconvoluted MS/MS  
CID in Ion trap

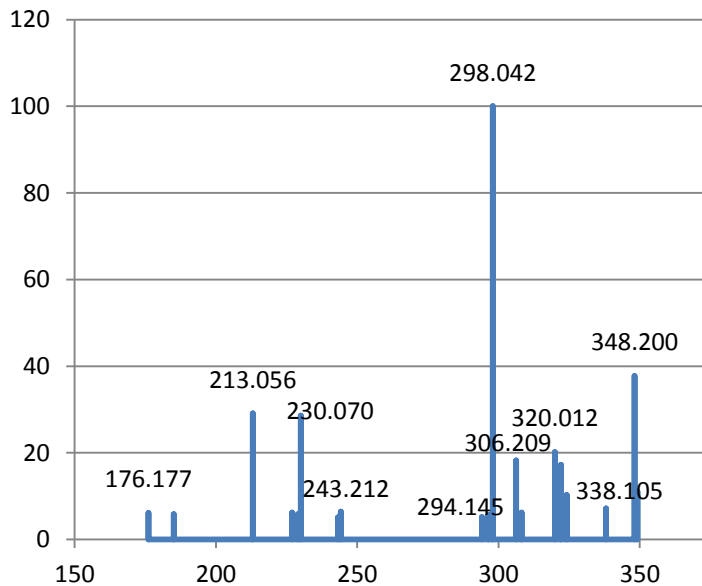

7) m/z 438.234

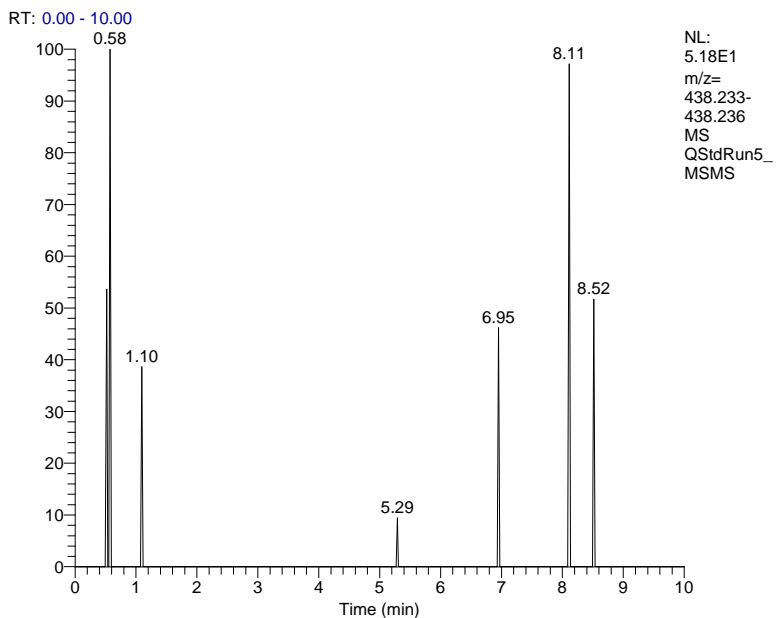

QStdRun5\_MSMS #31 RT: 0.58 AV: 1 NL: 1.10E2  
T: FTMS + p ESI SIM ms [433.00-443.00]

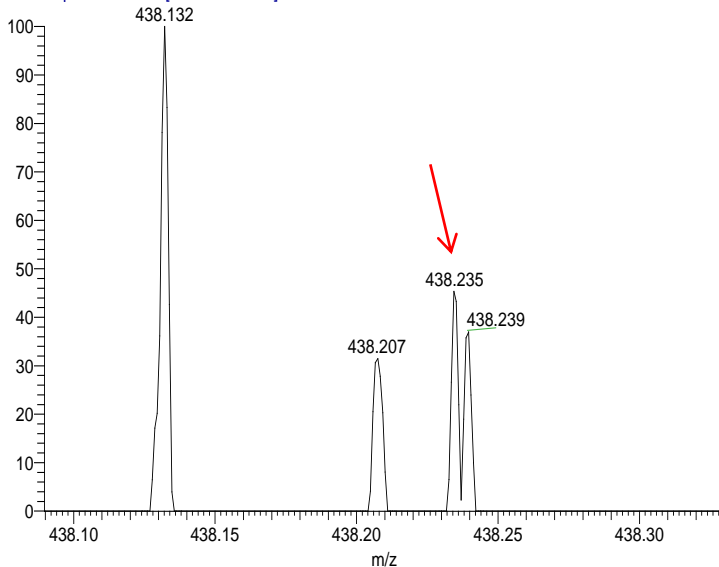

Deconvoluted MS/MS  
CID in Ion trap

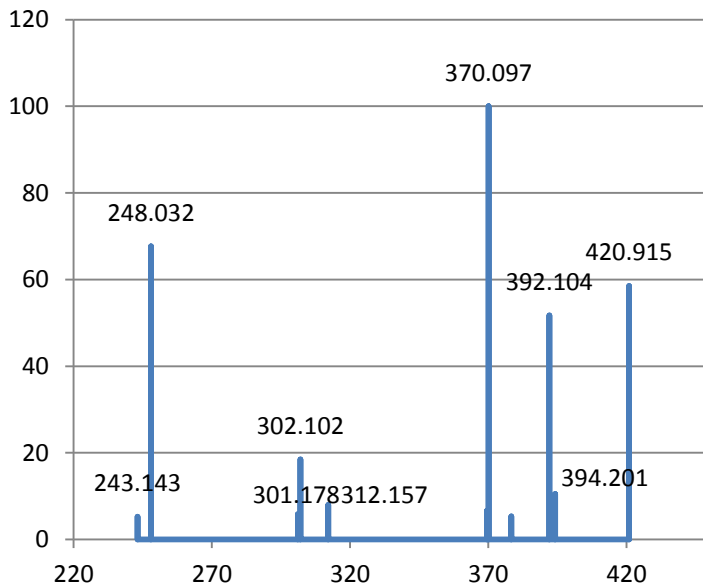

8) m/z 389.249

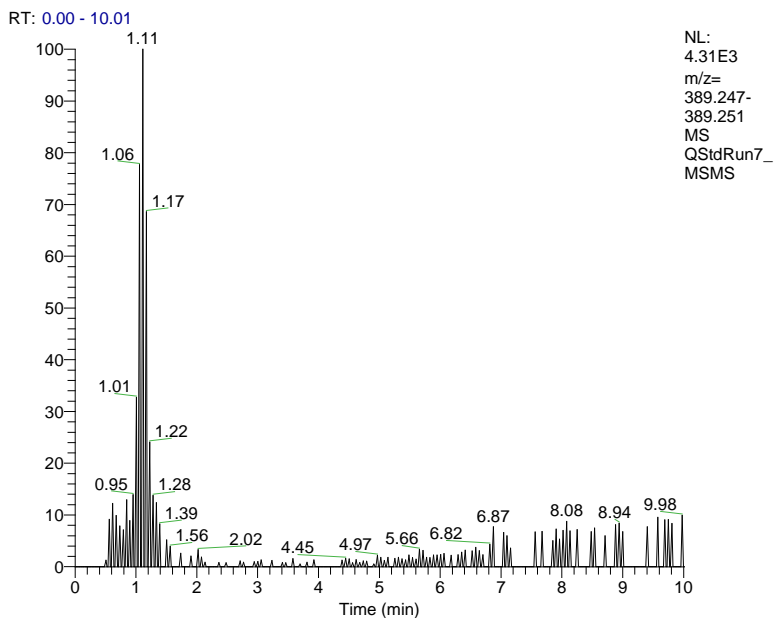

QStdRun7\_MSMS #115 RT: 2.13 AV: 1 NL: 4.76E2  
T: FTMS + p ESI SIM ms [384.00-394.00]

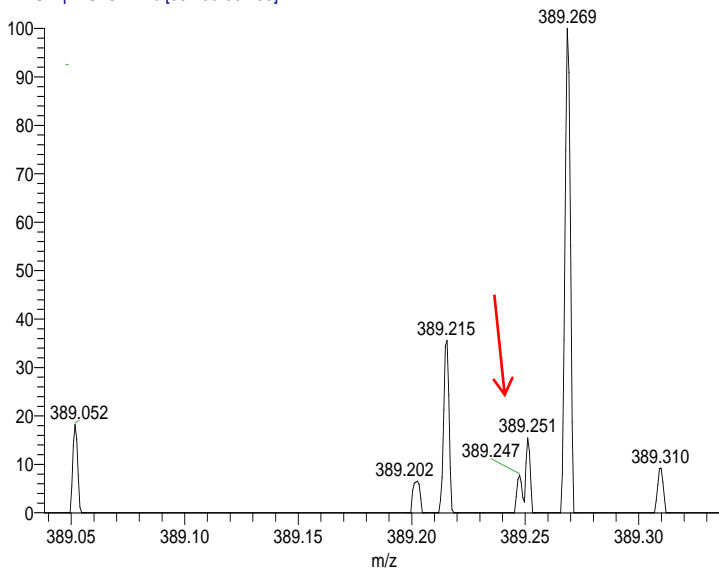

Deconvoluted MS/MS  
CID in Ion trap

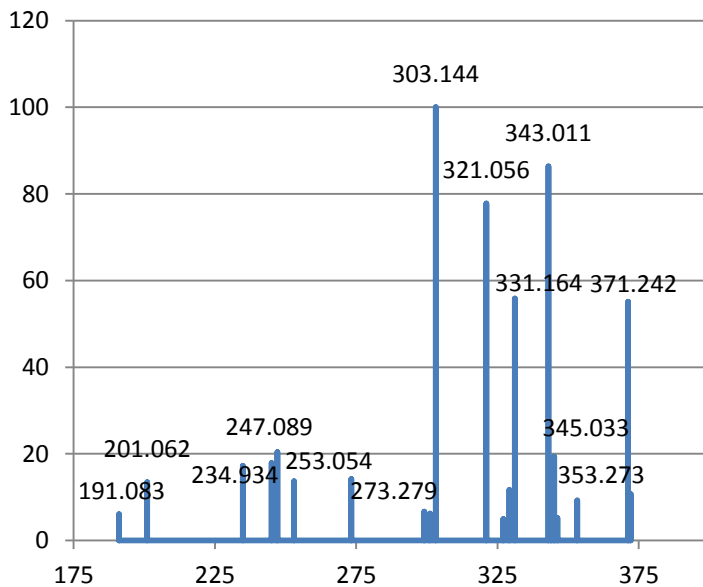

Supplement: 1471-2105-14-15-S11.pdf [file 1471-2105-14-15-S11.pdf]
